# Supplementary material
Source: PubMed Central journal article supplement (PMC4810830)
Supplement: rspb20152724supp1.pdf [file rspb20152724supp1.pdf]

Supplementary Figure and Table Legends for Saleem et al: *Trophic complexity in aqueous systems: Bacterial species richness and protistan predation regulate DOC and DTN removal*

### **Supplementary Figure S1**

The C:N ratio of microcosms with different bacterial monocultures after 48h of incubation. Every point represents an average of three replicates. The statistical differences were determined by ANOVA followed by a Tukey's test. Both carbon and nitrogen contents are represented as mg/l.

### **Supplementary Figure S2**

(a) Relative carbon (DOC) removal and (b) relative nitrogen (DTN) removal by single bacterial monocultures (B1 to B5) after exposure to different predation treatments. The letters indicate statistically significant differences among treatments. The significance was determined using ANOVA test followed by Tukey's Test.

### **Supplementary Figure S3**

Differences in relative removal of DOC and DTN across all predation treatments. Every point represents the average removal of these nutrients across all bacterial diversity levels. The significance was determined using ANOVA test followed by Tukey's Test.

### **Supplementary Figure S4**

Statistical difference of  $D_{max}$  values from zero in all experiments. Every point represents the average  $D_{max}$  values of all mixture combinations (n=26, in triplicate = 78) across all predation treatments. We used Wilcoxon signed rank test with continuity correction to compare the  $D_{max}$  values of all experiments. The \* above or below the zero line depicts the positive or negative significant difference of  $D_{max}$  from zero.

### **Supplementary Figure S5**

Relative removal (a, b) and transgressive ( $D_{\max}$ ) removal (c, d) of DOC and DTN in bacterial mixtures either containing the species B3 or without the species B3 (W-B3). Each point corresponds to the average of all replicates of each bacterial species combination in these specific mixtures across the bacterial species richness level. The bar represents standard error. The significance was determined using Student's t-test. Abbreviations: no-pr = predation free control; Ac = predation by *Acanthamoeba* sp.; Pot = predation by *Poteroochromonas* sp.; Tet = predation by *Tetrahymena* sp.; mul = predation by multiple predators

### **Supplementary Figure S6**

Relationship between predator production and relative DTN removal in microcosms exposed to multiple predators. Each point represents one individual replicate of both parameters plotted against each other. The significance was determined using linear regression followed by ANOVA.

### **Supplementary Figure S7**

Bacterial combinations which resulted in negative relative DTN removal values in the presence to multiple predators indicating a predator-driven release of bacterial N. Relative amounts are based on the comparison of DTN concentrations in multiple-predation treatments and blank (microbe free microcosms) controls. The significance was determined using ANOVA test followed by Tukey's Test.

### **Supplementary Figure S8**

The C:N ratio of microcosms in the medium before incubation, and in all predation treatments after 48h of incubation. Every point represents an average of all replicates of each

experiment. The statistical differences were determined by ANOVA followed by a Tukey's test. Both carbon and nitrogen contents are represented as mg/l.

### **Supplementary Figure S9**

Differences in the average relative removal of DOC and DTN by bacterial monoculture across all predation treatments. Every point represents the average removal of all monocultures in each experiment. The significance was determined using ANOVA test followed by Tukey's Test.

### **Supplementary Figure S10**

Differences in the average relative removal of DOC and DTN by bacterial mixtures (i.e., with 2-5 species) across all predation treatments. Every point represents the average removal of all mixtures in each experiment. The significance was determined using ANOVA test followed by Tukey's Test.

### **Supplementary Table S1.**

Spearman rank order correlation between bacterial and protist biodiversity mechanisms (i.e., complementarity and selection effects) and nutrient removal.

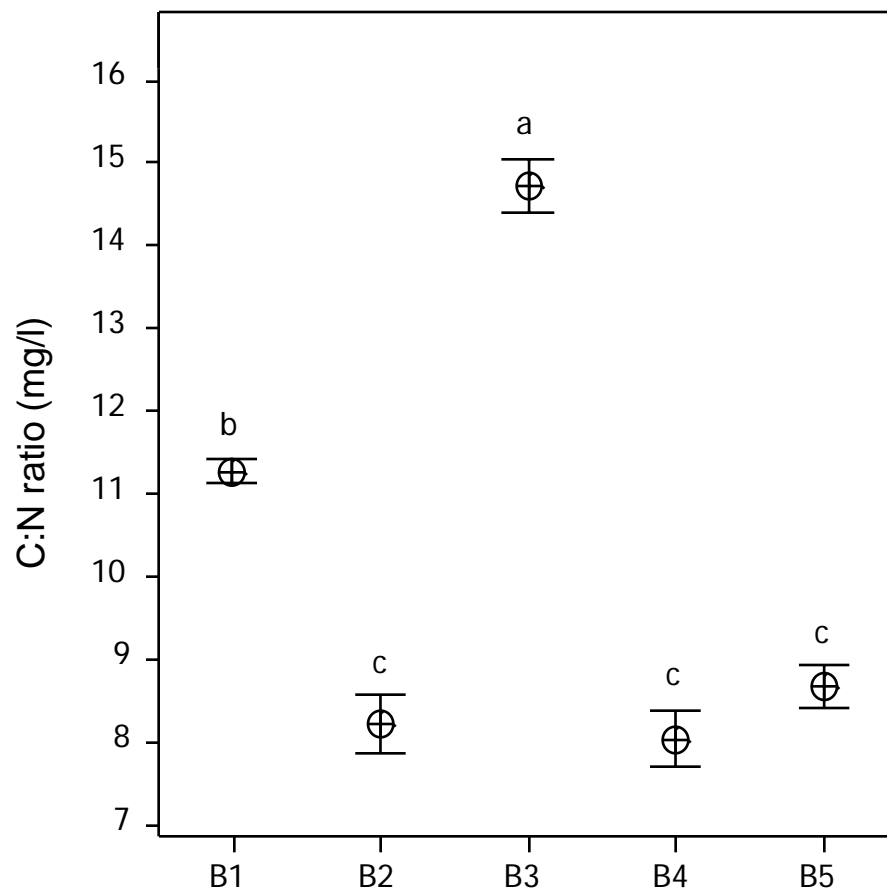

Supplementary Figure S1

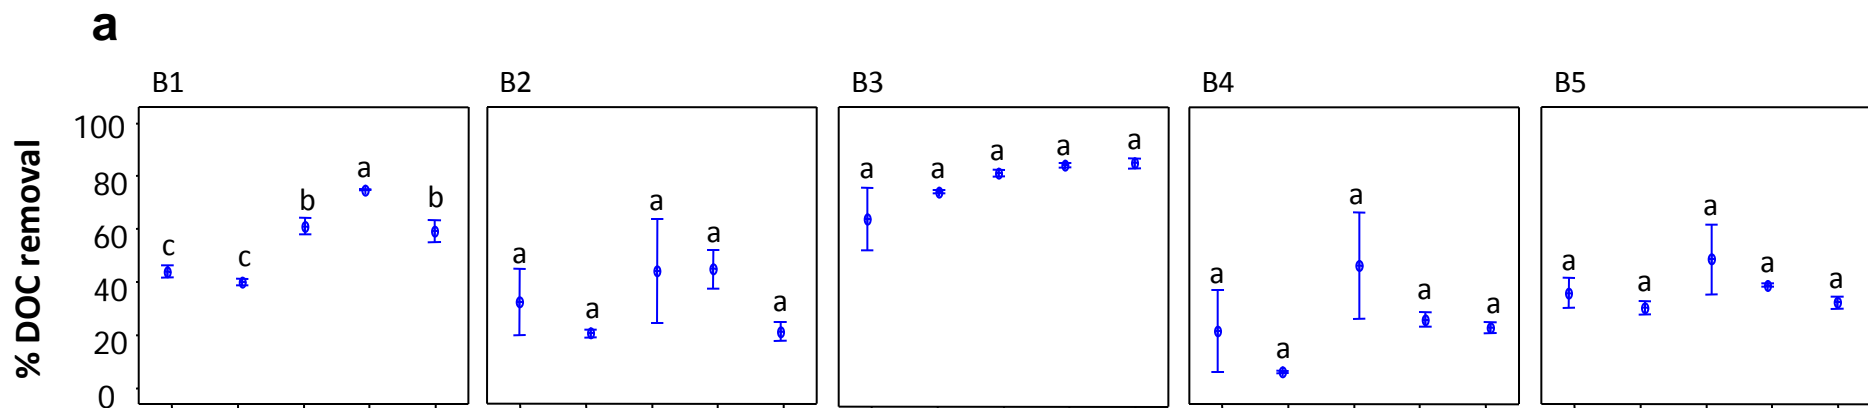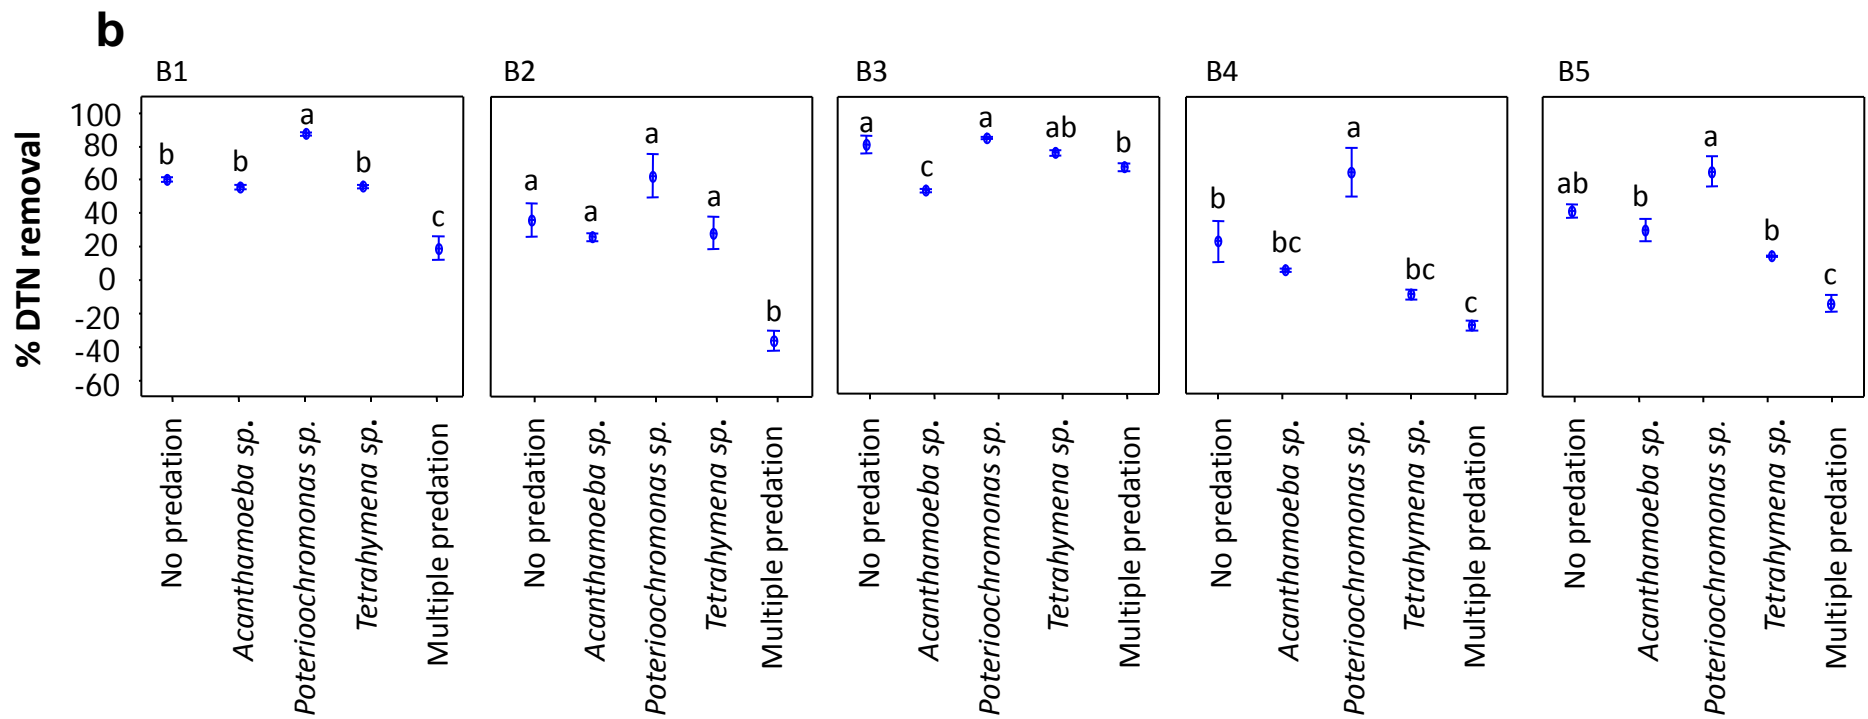

Supplementary Figure 2

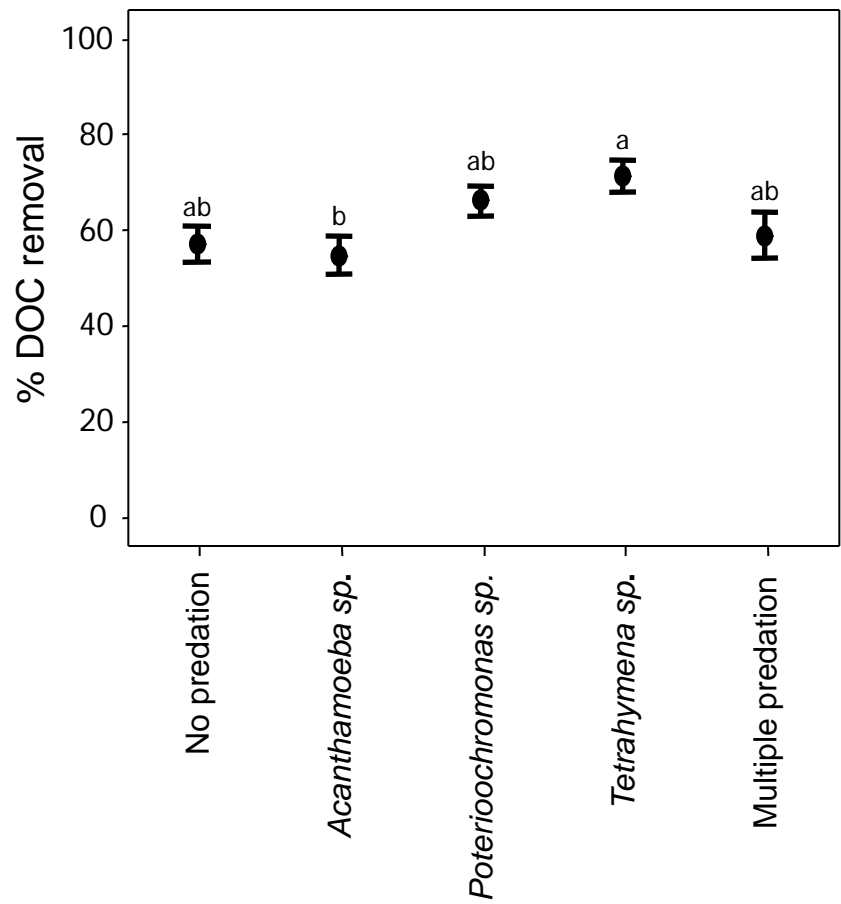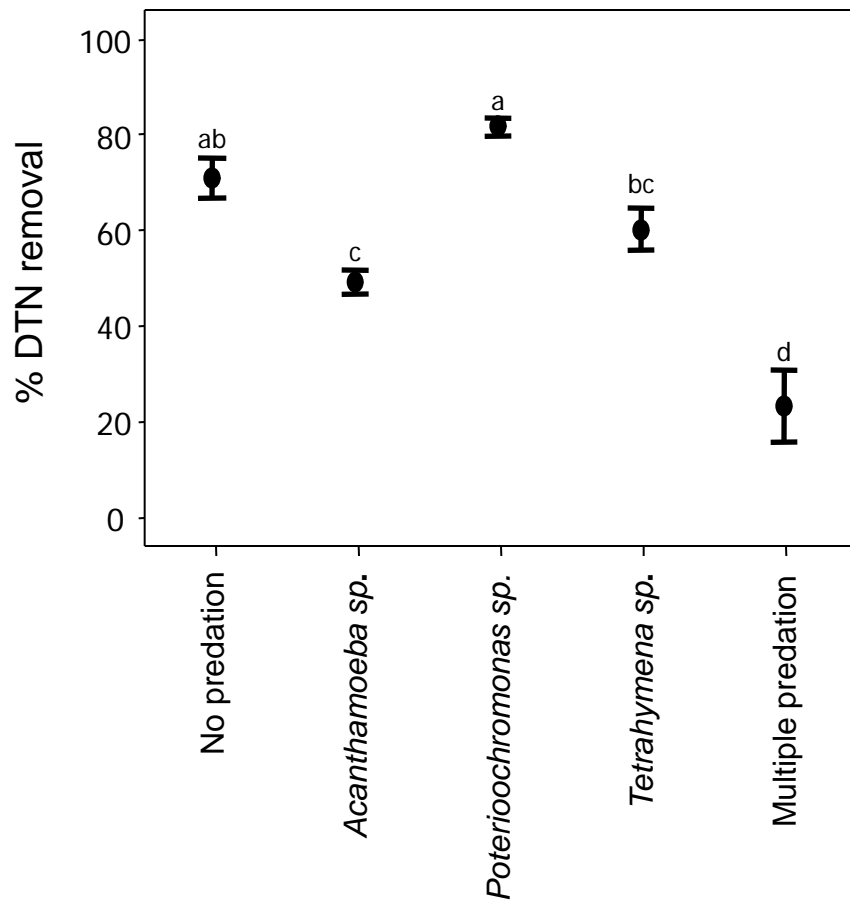

Supplementary Figure S3

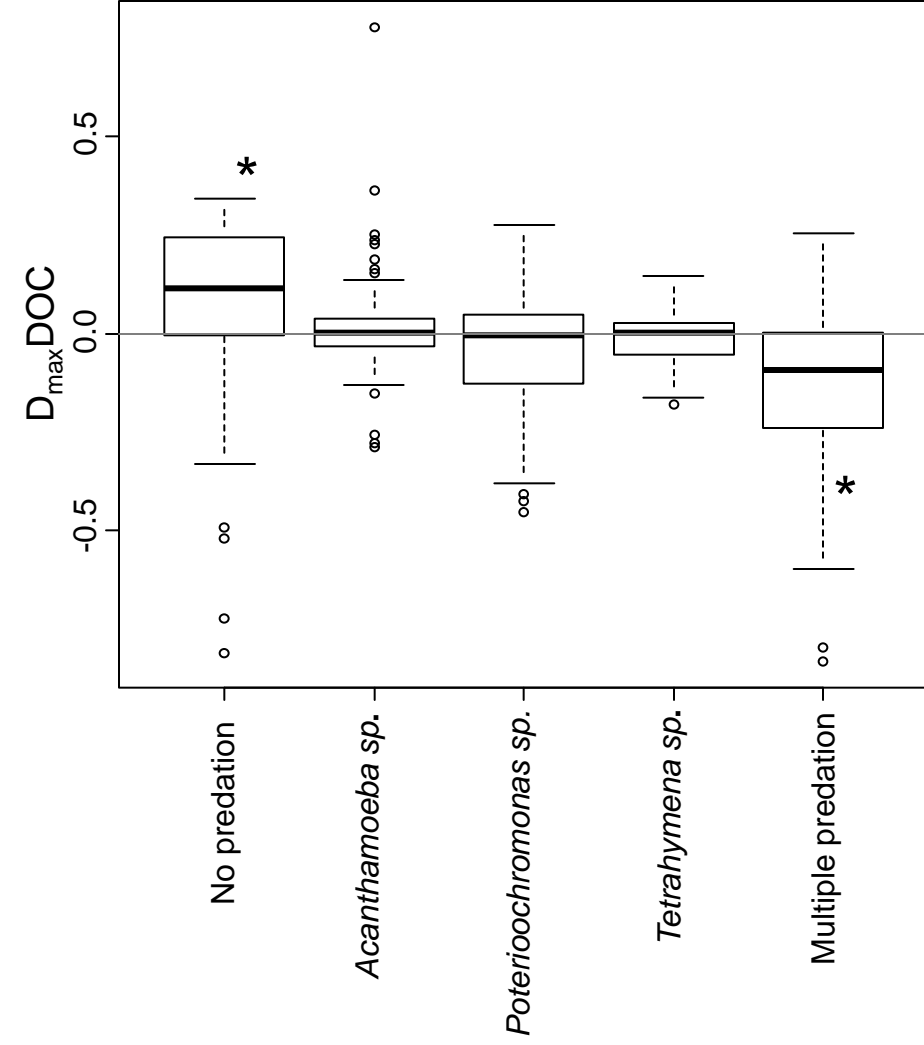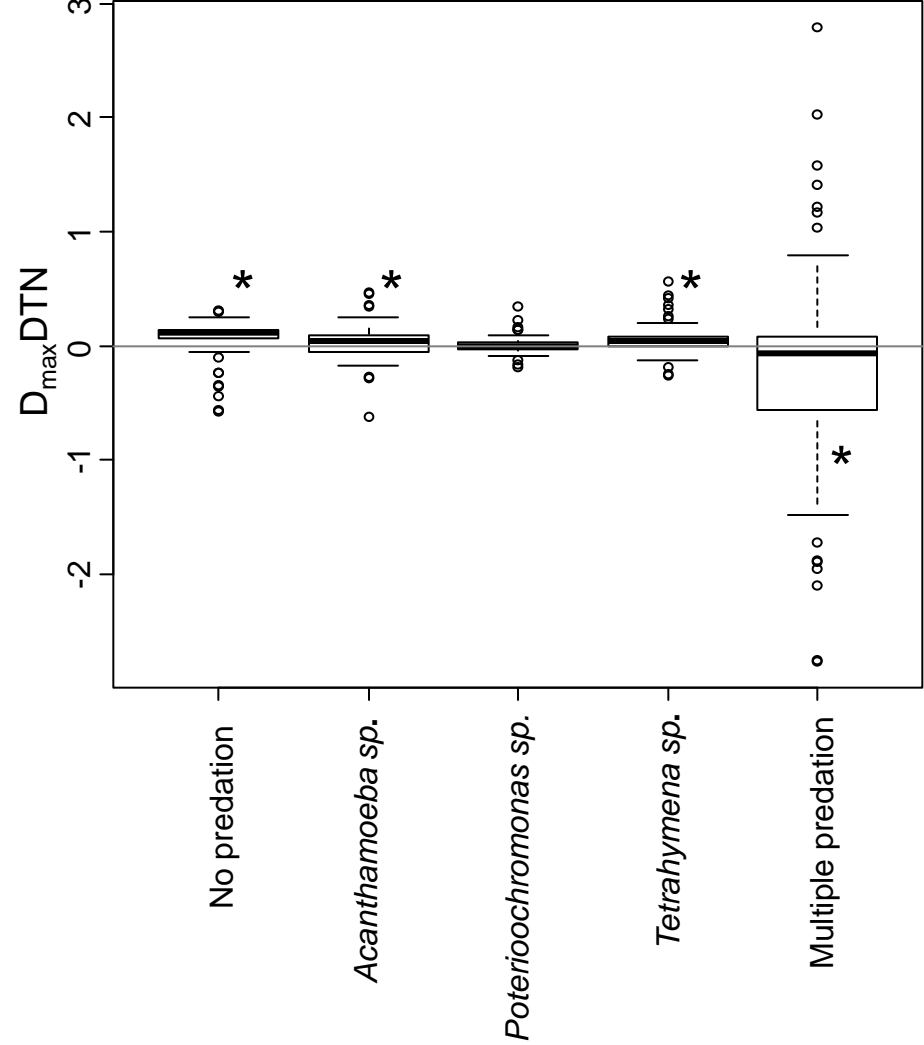

Supplementary Figure S4

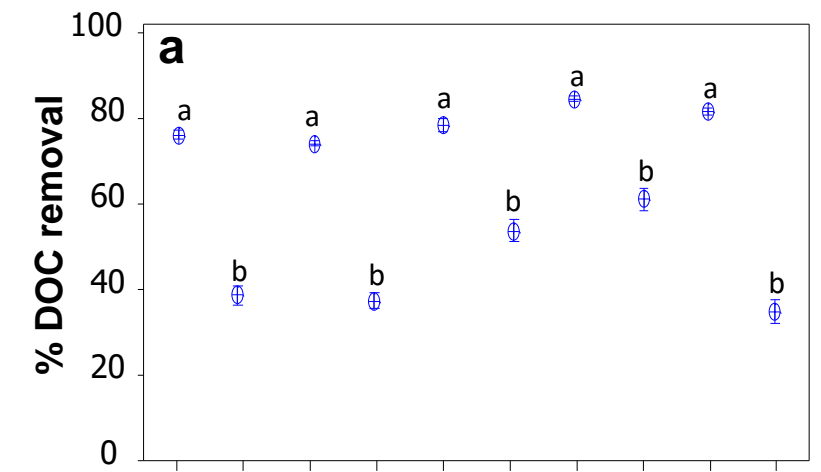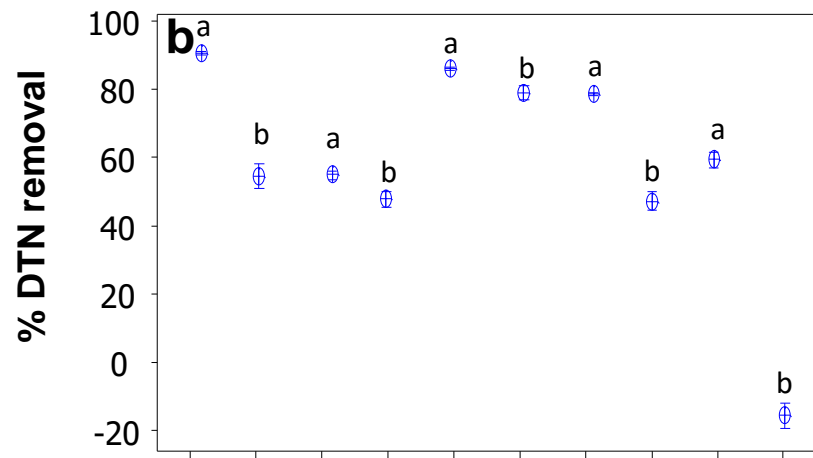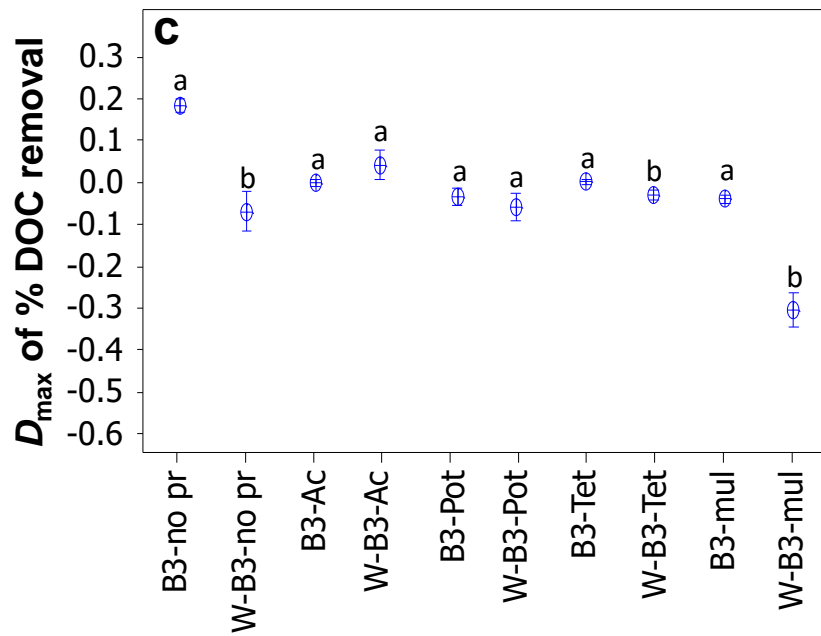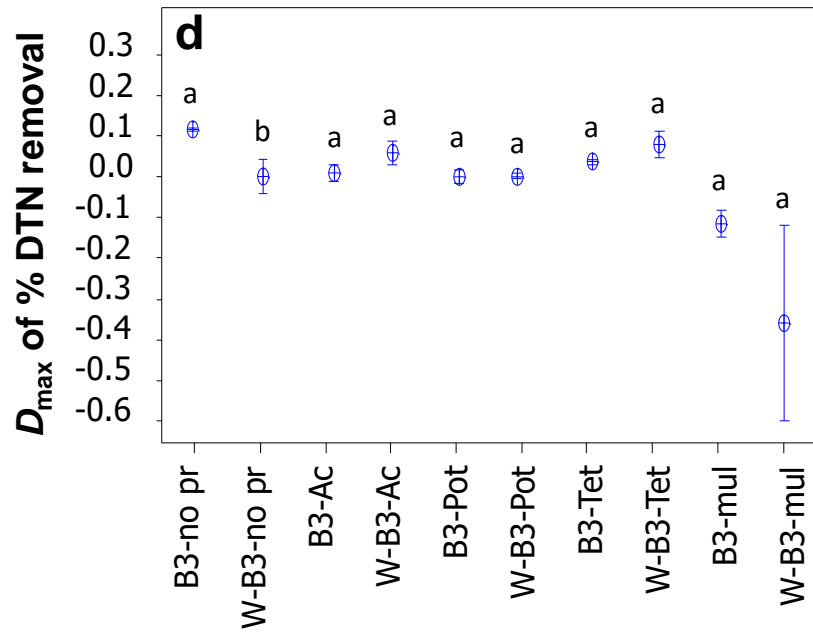



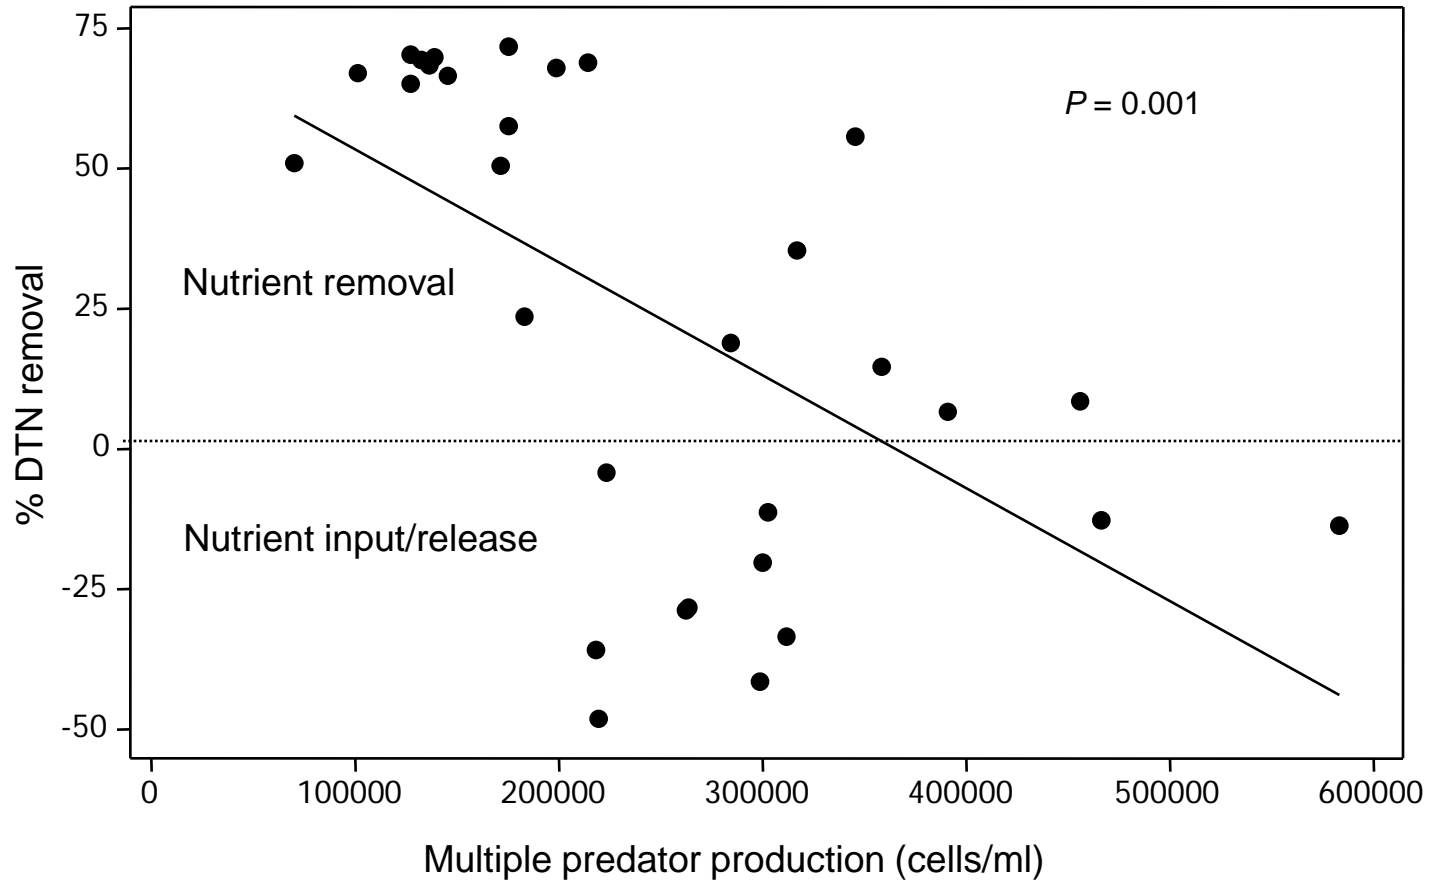

Supplementary Figure S6

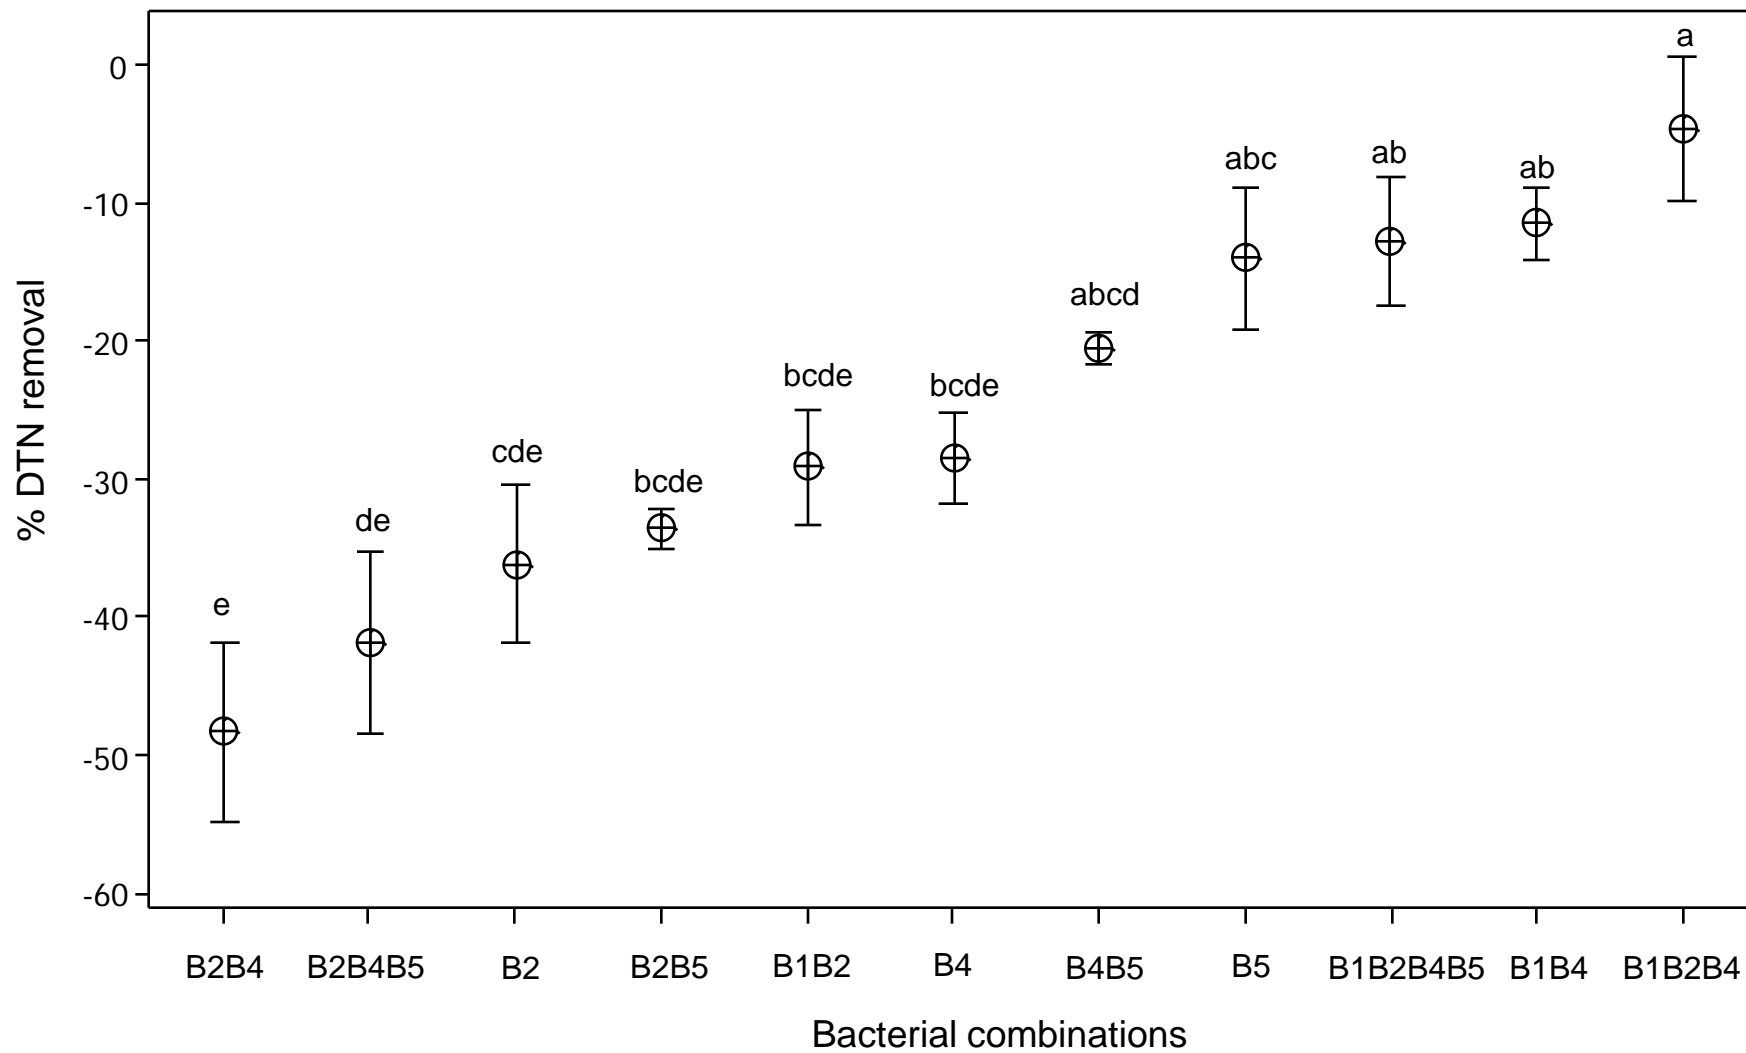

Supplementary Figure S7

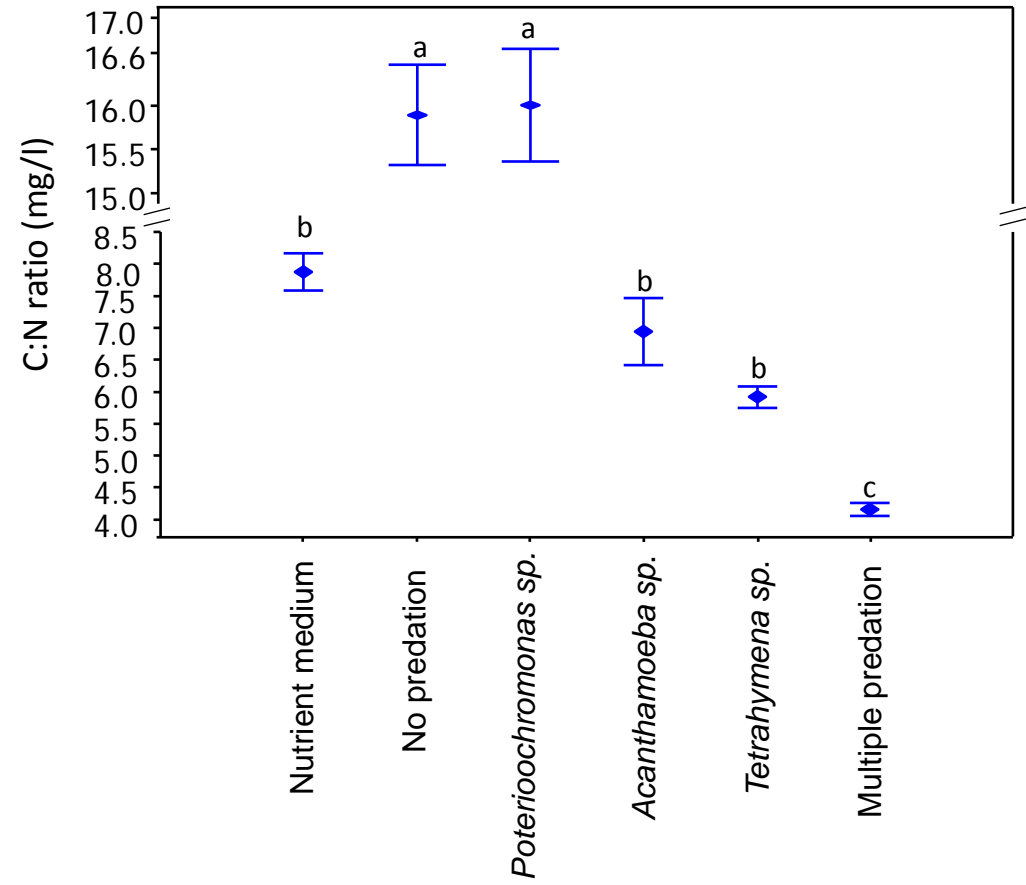

Supplementary Figure S8

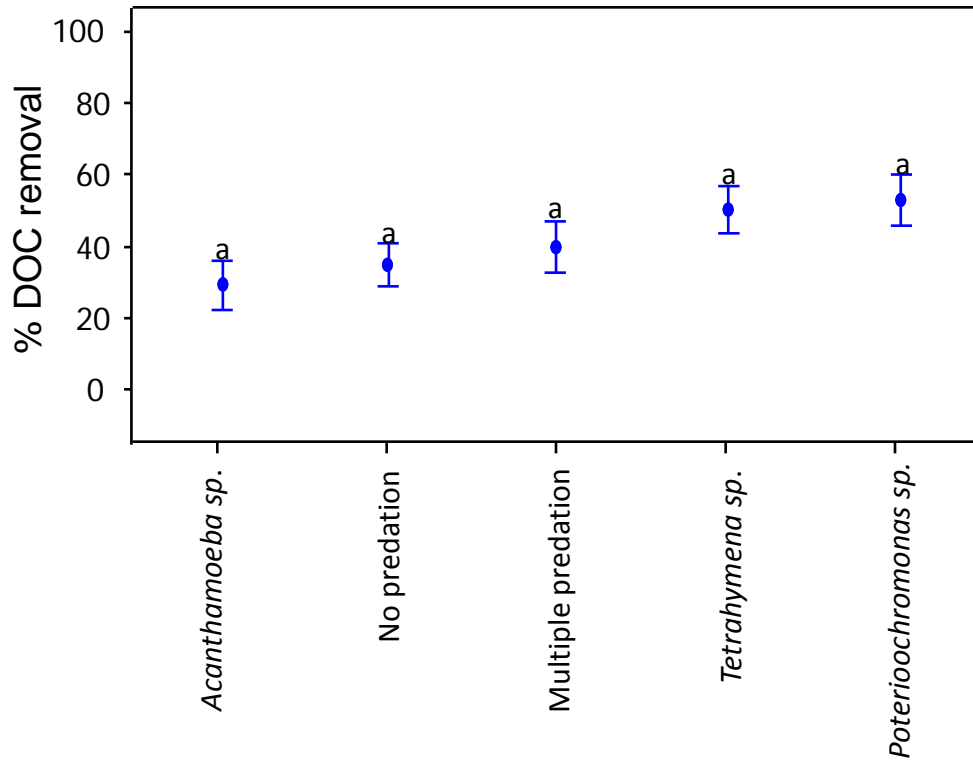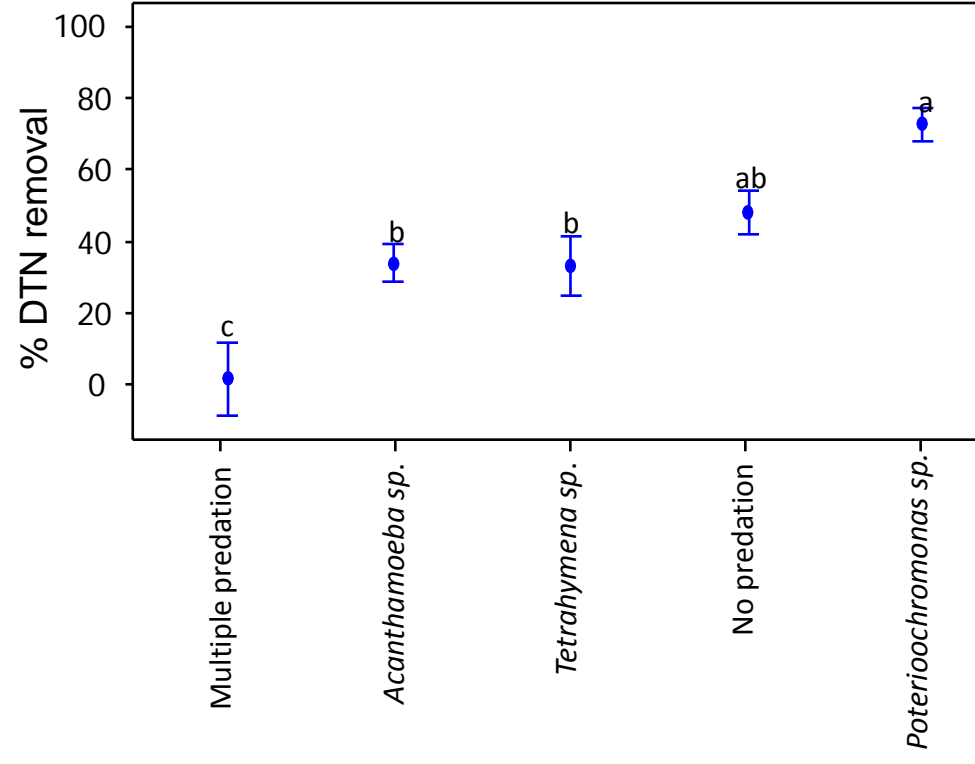

Supplementary Figure S9

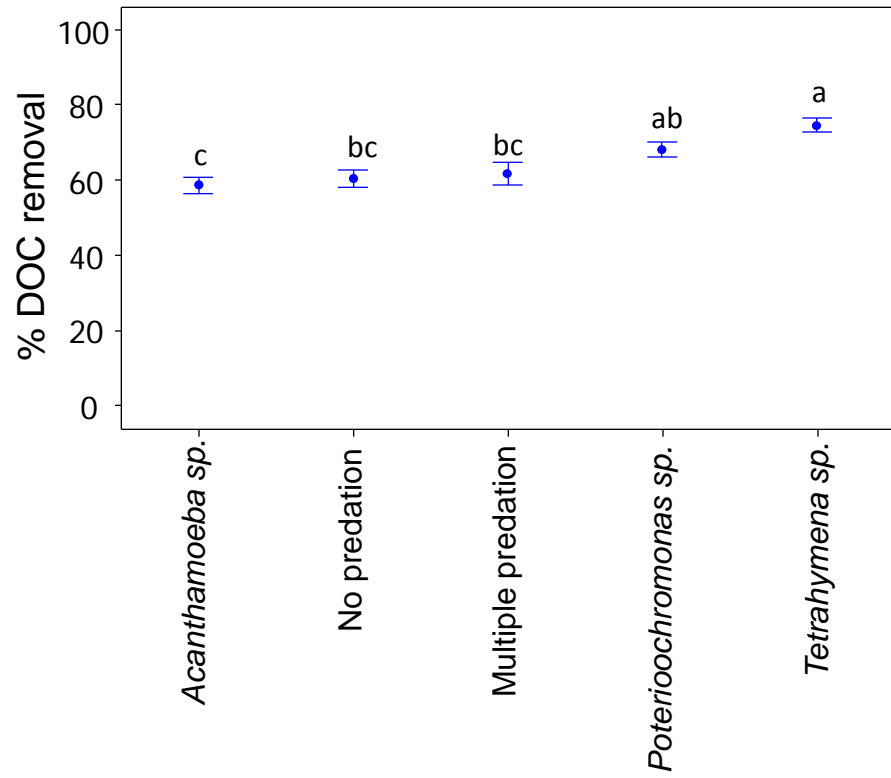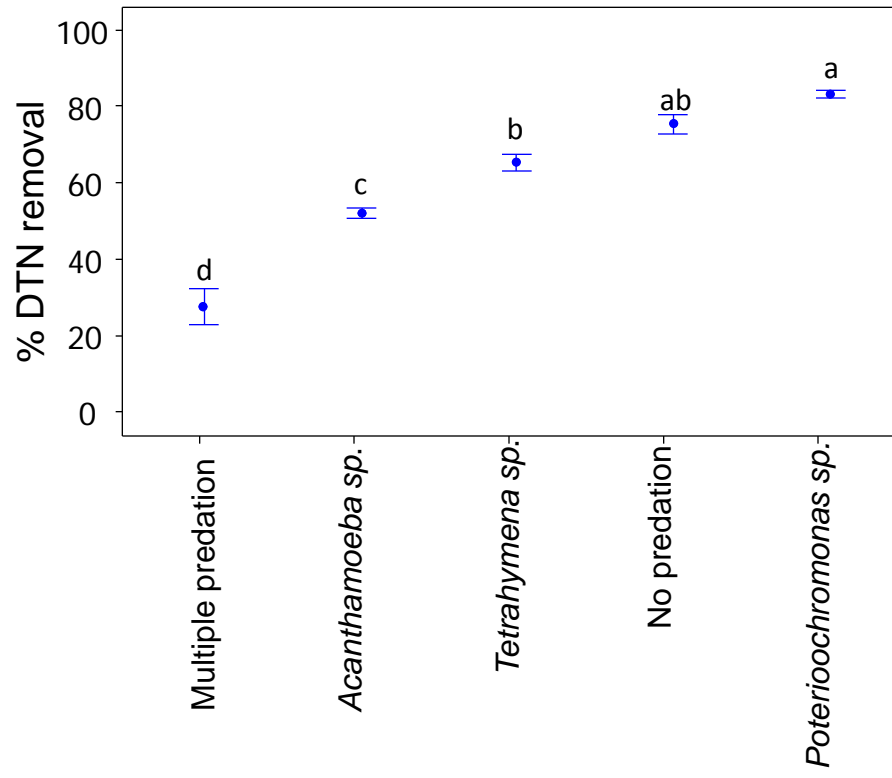

Supplementary Figure S10

Table S1. Spearman rank order correlation between bacterial and protist biodiversity mechanisms (i.e., complementarity and selection effects) and nutrient removal.

**Partitioned bacterial prey diversity effects on carbon and nitrogen removal**

|                             | Complementarity effect |        | Selection effect |        | Complementarity effect  |        | Selection effect |       |
|-----------------------------|------------------------|--------|------------------|--------|-------------------------|--------|------------------|-------|
|                             | <b>Carbon removal</b>  |        |                  |        | <b>Nitrogen removal</b> |        |                  |       |
|                             | r                      | p      | r                | p      | r                       | p      | r                | p     |
| Control (predation free)    | 0.226                  | 0.264  | -0.231           | 0.252  | 0.256                   | 0.204  | -0.275           | 0.171 |
| <i>Poteroochromonas</i> sp. | 0.385                  | 0.052  | -0.199           | 0.327  | 0.314                   | 0.117  | -0.229           | 0.256 |
| <i>Acanthamoeba</i> sp.     | -0.566                 | 0.0027 | 0.385            | 0.0516 | -0.157                  | 0.44   | 0.177            | 0.382 |
| <i>Tetrahymena</i> sp.      | 0.044                  | 0.828  | 0.0496           | 0.807  | 0.0619                  | 0.761  | -0.094           | 0.644 |
| Multiple predation          | 0.37                   | 0.0626 | -0.259           | 0.198  | 0.375                   | 0.0586 | -0.303           | 0.13  |

**Partitioned protistan predator diversity effects on carbon and nitrogen removal**

|                    |        |        |        |        |        |       |        |        |
|--------------------|--------|--------|--------|--------|--------|-------|--------|--------|
| Multiple predation | -0.475 | 0.0072 | -0.319 | 0.0794 | -0.477 | 0.007 | -0.319 | 0.0794 |
|--------------------|--------|--------|--------|--------|--------|-------|--------|--------|
